# Supplementary material for: Prognostic factors and treatment of neuroendocrine tumors of the uterine cervix based on the FIGO 2018 staging system: a single-institution study of 172 patients
Source: PeerJ. 2021 Jul 6;9:e11563. doi: 10.7717/peerj.11563 (PMC8269661; doi:10.7717/peerj.11563)
Supplement: Supplemental Information 1 [file peerj-09-11563-s001.xlsx]

## Sheet: Sheet1
os all		pfs all		FIGO os			FIGO pfs			size os			size pfs			age os			age pfs			chemotherapy regimen os			chemotherapy regimen pfs			Para-aortic lymph node os			Para-aortic lymph node pfs			Pelvic lymph node os			Pelvic lymph node pfs
time	survive	time	survive	time	survive	group	time	survive	group	time	survive	group	time	survive	group	time	survive	group	time	survive	group	time	survive	group	time	survive	group	time	survive	group	time	survive	group	time	survive	group	time	survive	group
12.8667	1	12.4	1	134.367	0	1	134.367	0	1	134.367	0	1	134.367	0	1	134.367	0	1	134.367	0	1	134.367	0	1	134.367	0	1	12	1	0	9.46667	1	0	134.367	0	0	134.367	0	0
134.833	0	134.833	0	136.1	0	1	136.1	0	1	136.1	0	1	136.1	0	1	117.1	0	1	117.1	0	1	117.1	0	1	117.1	0	1	46.8	1	0	8.23333	1	0	117.1	0	0	117.1	0	0
14.5	1	13.5	1	34.8333	1	1	22.4667	1	1	117.1	0	1	117.1	0	1	90.5667	0	1	90.5667	0	1	90.5667	0	1	90.5667	0	1	12.8	1	0	12.8	1	0	90.5667	0	0	90.5667	0	0
134.367	0	134.367	0	117.1	0	1	117.1	0	1	90.5667	0	1	90.5667	0	1	53.8	1	1	53.8	1	1	53.8	1	1	53.8	1	1	9.6	1	0	11.5333	1	0	53.8	1	0	53.8	1	0
10.7	1	7.76667	1	112.3	0	1	112.3	0	1	53.8	1	1	53.8	1	1	81.2667	1	1	41	1	1	81.2667	1	1	41	1	1	14.5	1	0	13.5	1	0	81.2667	1	0	41	1	0
136.1	0	136.1	0	73.2333	1	1	73.2333	1	1	81.2667	1	1	41	1	1	45.2333	0	1	45.2333	0	1	45.2333	0	1	45.2333	0	1	37.1333	1	0	29.4	1	0	45.2333	0	0	45.2333	0	0
4.66667	1	4.66667	1	90.5667	0	1	90.5667	0	1	69.2667	0	1	69.2667	0	1	40.8	0	1	40.8	0	1	40.8	0	1	40.8	0	1	12.8667	1	0	12.4	1	0	40.8	0	0	40.8	0	0
75.8	1	27.1333	1	40.6667	1	1	14.5667	1	1	51.2	0	1	51.2	0	1	187.333	0	1	187.333	0	1	187.333	0	1	187.333	0	1	55.1333	1	0	8.83333	1	0	187.333	0	0	187.333	0	0
128.267	0	16.5	1	40.9	1	1	5.4	1	1	45.2333	0	1	45.2333	0	1	177.067	0	1	177.067	0	1	177.067	0	1	177.067	0	1	15.9667	1	0	15.4333	1	0	177.067	0	0	177.067	0	0
34.8333	1	22.4667	1	84.7667	0	1	84.7667	0	1	40.8	0	1	40.8	0	1	29.5667	0	1	13.6	1	1	29.5667	0	1	13.6	1	1	2.13333	1	0	2.13333	1	0	29.5667	0	0	13.6	1	0
83.1667	0	83.1667	0	53.8	1	1	53.8	1	1	12	1	1	9.46667	1	1	24.6333	0	1	24.6333	0	1	24.6333	0	1	24.6333	0	1	68	1	0	2	1	0	24.6333	0	0	24.6333	0	0
40.3	1	25.8	1	79.9	0	1	79.9	0	1	187.333	0	1	187.333	0	1	22.5333	0	1	22.5333	0	1	22.5333	0	1	22.5333	0	1	12.6333	1	0	12.6333	1	0	22.5333	0	0	22.5333	0	0
18.7333	1	11.1667	1	81.2667	1	1	41	1	1	177.067	0	1	177.067	0	1	22.8333	0	1	22.8333	0	1	22.8333	0	1	22.8333	0	1	4.66667	1	0	4.66667	1	0	22.8333	0	0	22.8333	0	0
123.533	0	123.533	0	69.2667	0	1	69.2667	0	1	37.2667	0	1	37.2667	0	1	14.5	1	1	13.5	1	1	14.5	1	1	13.5	1	1	42	1	0	35.8667	1	0	14.5	1	0	13.5	1	0
24.8333	1	3.26667	1	69.2667	0	1	69.2667	0	1	29.5667	0	1	13.6	1	1	83.1667	0	1	83.1667	0	1	83.1667	0	1	83.1667	0	1	21.1667	1	0	13.4333	1	0	83.1667	0	0	83.1667	0	0
120.333	0	120.333	0	51.2	0	1	51.2	0	1	31.9333	0	1	21.4333	1	1	102.7	0	1	102.7	0	1	102.7	0	1	102.7	0	1	2.63333	1	0	2.63333	1	0	102.7	0	0	102.7	0	0
78.6	1	36.6667	1	45.2333	0	1	45.2333	0	1	24.6333	0	1	24.6333	0	1	70.9667	1	1	70.9667	1	1	70.9667	1	1	70.9667	1	1	20.1333	1	0	16.2667	1	0	70.9667	1	0	70.9667	1	0
117.1	0	117.1	0	40.8	0	1	40.8	0	1	22.5333	0	1	22.5333	0	1	60.4333	1	1	60.4333	1	1	60.4333	1	1	60.4333	1	1	14.9	1	0	14.9	1	0	60.4333	1	0	60.4333	1	0
24.8	1	13.1	1	12	1	1	9.46667	1	1	22.4	0	1	22.4	0	1	88.2	0	1	88.2	0	1	88.2	0	1	88.2	0	1	11.6667	1	0	10.2667	1	0	88.2	0	0	88.2	0	0
102.7	0	102.7	0	187.333	0	1	187.333	0	1	22.8333	0	1	22.8333	0	1	37.1333	1	1	29.4	1	1	22.3	0	1	22.3	0	1	60.4333	1	0	60.4333	1	0	22.3	0	0	22.3	0	0
39.4	1	27.1	1	177.067	0	1	177.067	0	1	14.5	1	1	13.5	1	1	22.3	0	1	22.3	0	1	70.3	0	1	70.3	0	1	10.3	1	0	9.1	1	0	40.9	1	0	5.4	1	0
114.267	0	114.267	0	10.3667	1	1	9.96667	1	1	83.1667	0	1	83.1667	0	1	70.3	0	1	70.3	0	1	45.4333	0	1	16.6667	1	1	6.73333	1	0	6.73333	1	0	69.2667	0	0	69.2667	0	0
100.833	0	100.833	0	68	1	1	2	1	1	102.7	0	1	102.7	0	1	45.4333	0	1	16.6667	1	1	33.7	0	1	33.7	0	1	17.2333	1	0	6.83333	1	0	10.3667	1	0	9.96667	1	0
100.6	0	100.6	0	37.2667	0	1	37.2667	0	1	70.9667	1	1	70.9667	1	1	33.7	0	1	33.7	0	1	27.1667	1	1	27.1667	1	1	7.86667	1	0	1.16667	1	0	19.5	0	0	19.5	0	0
71.8333	1	71.8333	1	19.5	0	1	19.5	0	1	60.4333	1	1	60.4333	1	1	27.1667	1	1	27.1667	1	1	40.9	1	1	5.4	1	1	117.567	1	0	5.46667	1	0	100.833	0	0	100.833	0	0
16.1	1	16.1	1	29.5667	0	1	13.6	1	1	15.6667	1	1	10.0333	1	1	40.9	1	1	5.4	1	1	69.2667	0	1	69.2667	0	1	45.4	1	0	45.4	1	0	71.8333	1	0	71.8333	1	0
111.5	0	111.5	0	31.9333	0	1	21.4333	1	1	88.2	0	1	88.2	0	1	79.9	0	1	79.9	0	1	10.3667	1	1	9.96667	1	1	66.7667	1	0	58	1	0	110.733	0	0	110.733	0	0
112.3	0	112.3	0	24.6333	0	1	24.6333	0	1	56.4333	0	1	56.4333	0	1	69.2667	0	1	69.2667	0	1	68	1	1	2	1	1	6.23333	1	0	6.23333	1	0	106.6	0	0	106.6	0	0
110.733	0	110.733	0	22.5333	0	1	22.5333	0	1	17.2333	1	1	6.83333	1	1	10.3667	1	1	9.96667	1	1	19.5	0	1	19.5	0	1	14.6	1	0	9.66667	1	0	93.1	0	0	93.1	0	0
73.2333	1	73.2333	1	22.4	0	1	22.4	0	1	53.1333	0	1	53.1333	0	1	68	1	1	2	1	1	134.833	0	1	134.833	0	1	7.83333	1	0	5.7	1	0	66.7667	1	0	58	1	0
5.03333	1	5.03333	1	22.8333	0	1	22.8333	0	1	44.9667	0	1	44.9667	0	1	19.5	0	1	19.5	0	1	123.533	0	1	123.533	0	1	34.8333	1	0	22.4667	1	0	76.6333	0	0	76.6333	0	0
106.6	0	106.6	0	134.833	0	2	134.833	0	2	36.5	0	1	36.5	0	1	134.833	0	1	134.833	0	1	100.833	0	1	100.833	0	1	40.9	1	0	5.4	1	0	75.7	0	0	75.7	0	0
93.1	0	93.1	0	14.5	1	2	13.5	1	2	141.1	0	1	141.1	0	1	123.533	0	1	123.533	0	1	100.6	0	1	100.6	0	1	81.2667	1	0	41	1	0	74.0667	0	0	74.0667	0	0
42	1	35.8667	1	4.66667	1	2	4.66667	1	2	37.1333	1	1	29.4	1	1	100.833	0	1	100.833	0	1	71.8333	1	1	71.8333	1	1	14.9	1	0	14.9	1	0	14.9	1	0	14.9	1	0
25.3333	1	21.2	1	83.1667	0	2	83.1667	0	2	22.3	0	1	22.3	0	1	100.6	0	1	100.6	0	1	110.733	0	1	110.733	0	1	29.2333	1	0	29.2333	1	0	193.4	0	0	193.4	0	0
103.3	0	103.3	0	18.7333	1	2	11.1667	1	2	29.3667	0	1	29.3667	0	1	71.8333	1	1	71.8333	1	1	106.6	0	1	106.6	0	1	10.3667	1	0	9.96667	1	0	19.1667	1	0	14.7667	1	0
70.9667	1	70.9667	1	123.533	0	2	123.533	0	2	25.1	0	1	15.0667	1	1	110.733	0	1	110.733	0	1	93.1	0	1	93.1	0	1	40.3	1	0	25.8	1	0	72.0333	1	0	71.3667	1	0
100.567	0	100.567	0	24.8	1	2	13.1	1	2	17.2	0	1	17.2	0	1	106.6	0	1	106.6	0	1	45.4	1	1	45.4	1	1	25.3333	1	0	21.2	1	0	140.767	0	0	140.767	0	0
30.4667	1	25.6	1	102.7	0	2	102.7	0	2	17.1333	0	1	17.1333	0	1	93.1	0	1	93.1	0	1	66.7667	1	1	58	1	1	55.8667	1	0	55.8667	1	0	136.1	0	0	136.1	0	0
60.4333	1	60.4333	1	39.4	1	2	27.1	1	2	16.2	0	1	16.2	0	1	45.4	1	1	45.4	1	1	76.6333	0	1	76.6333	0	1	33.2333	1	0	26.2667	1	0	51.2	0	0	51.2	0	0
15.6667	1	10.0333	1	100.833	0	2	100.833	0	2	34.2333	1	1	3.46667	1	1	66.7667	1	1	58	1	1	75.7	0	1	75.7	0	1	8.33333	1	0	5.8	1	0	37.2667	0	0	37.2667	0	0
45.4	1	45.4	1	100.6	0	2	100.6	0	2	88.3	0	1	88.3	0	1	76.6333	0	1	76.6333	0	1	74.0667	0	1	74.0667	0	1	21.5667	1	0	21.5667	1	0	22.4	0	0	22.4	0	0
57.4	1	6.6	1	71.8333	1	2	71.8333	1	2	70.3	0	1	70.3	0	1	75.7	0	1	75.7	0	1	14.9	1	1	14.9	1	1	73.2333	1	0	73.2333	1	0	56.4333	0	0	56.4333	0	0
34.2333	1	3.46667	1	110.733	0	2	110.733	0	2	45.4333	0	1	16.6667	1	1	74.0667	0	1	74.0667	0	1	46.8667	0	1	46.8667	0	1	24	1	0	6.9	1	0	17.2333	1	0	6.83333	1	0
90.5667	0	90.5667	0	106.6	0	2	106.6	0	2	33.7	0	1	33.7	0	1	14.9	1	1	14.9	1	1	193.4	0	1	193.4	0	1	12.9333	1	0	4.13333	1	0	44.9667	0	0	44.9667	0	0
26.5333	1	12.9333	1	93.1	0	2	93.1	0	2	181.967	0	1	181.967	0	1	46.8667	0	1	46.8667	0	1	19.1667	1	1	14.7667	1	1	8.23333	1	0	5.86667	1	0	36.5	0	0	36.5	0	0
40.6667	1	14.5667	1	25.3333	1	2	21.2	1	2	16.0333	0	1	16.0333	0	1	193.4	0	1	193.4	0	1	72.0333	1	1	71.3667	1	1	31.9333	0	0	21.4333	1	0	141.1	0	0	141.1	0	0
88.3	0	88.3	0	70.9667	1	2	70.9667	1	2	11.7667	0	1	8.46667	1	1	19.1667	1	1	14.7667	1	1	140.767	0	1	140.767	0	1	26.5333	1	0	12.9333	1	0	29.3667	0	0	29.3667	0	0
66.7667	1	58	1	100.567	0	2	100.567	0	2	30.4333	1	1	28.4	1	1	72.0333	1	1	71.3667	1	1	10.7	1	1	7.76667	1	1	18.5667	1	0	18.5667	1	0	25.1	0	0	15.0667	1	0
88.2	0	88.2	0	60.4333	1	2	60.4333	1	2	27.1667	1	1	27.1667	1	1	140.767	0	1	140.767	0	1	128.267	0	1	16.5	1	1	10.7	1	0	7.76667	1	0	17.2	0	0	17.2	0	0
40.9	1	5.4	1	15.6667	1	2	10.0333	1	2	34.8333	1	2	22.4667	1	2	10.7	1	1	7.76667	1	1	120.333	0	1	120.333	0	1	18.7333	1	0	11.1667	1	0	16.2	0	0	16.2	0	0
84.7667	0	84.7667	0	45.4	1	2	45.4	1	2	112.3	0	2	112.3	0	2	128.267	0	1	16.5	1	1	114.267	0	1	114.267	0	1	11.5	1	0	7.53333	1	0	34.8333	1	0	22.4667	1	0
84.4333	0	84.4333	0	66.7667	1	2	58	1	2	73.2333	1	2	73.2333	1	2	120.333	0	1	120.333	0	1	16.1	1	1	16.1	1	1	45.4333	0	0	16.6667	1	0	112.3	0	0	112.3	0	0
55.1333	1	8.83333	1	88.2	0	2	88.2	0	2	40.6667	1	2	14.5667	1	2	114.267	0	1	114.267	0	1	111.5	0	1	111.5	0	1	83.0333	1	0	83.0333	1	0	73.2333	1	0	73.2333	1	0
24.5	1	10.9333	1	84.4333	0	2	84.4333	0	2	40.9	1	2	5.4	1	2	16.1	1	1	16.1	1	1	103.3	0	1	103.3	0	1	53.8	1	0	53.8	1	0	40.6667	1	0	14.5667	1	0
53.8	1	53.8	1	55.1333	1	2	8.83333	1	2	84.7667	0	2	84.7667	0	2	111.5	0	1	111.5	0	1	28.4333	1	1	13.7667	1	1	29.5667	0	0	13.6	1	0	18.7333	1	0	11.1667	1	0
46.8	1	8.23333	1	55.8667	1	2	55.8667	1	2	79.9	0	2	79.9	0	2	103.3	0	1	103.3	0	1	14.4667	1	1	9.33333	1	1	15.6667	1	0	10.0333	1	0	24.8	1	0	13.1	1	0
79.9	0	79.9	0	12.8	1	2	12.8	1	2	69.2667	0	2	69.2667	0	2	28.4333	1	1	13.7667	1	1	27.7	1	1	26.7667	1	1	28.4333	1	0	13.7667	1	0	39.4	1	0	27.1	1	0
27.3333	1	27.3333	1	76.6333	0	2	76.6333	0	2	10.3667	1	2	9.96667	1	2	14.4667	1	1	9.33333	1	1	21.1667	1	1	13.4333	1	1	38.2333	1	0	38.2333	1	0	100.567	0	0	100.567	0	0
55.8667	1	55.8667	1	75.7	0	2	75.7	0	2	68	1	2	2	1	2	27.7	1	1	26.7667	1	1	58.6667	0	1	58.6667	0	1	20.6	1	0	20.6	1	0	73.6333	0	0	73.6333	0	0
8.23333	1	5.86667	1	74.0667	0	2	74.0667	0	2	19.5	0	2	19.5	0	2	21.1667	1	1	13.4333	1	1	3.16667	1	1	0.266667	1	1	11.7667	0	0	8.46667	1	0	10.3	1	0	9.1	1	0
12.8	1	12.8	1	73.6333	0	2	73.6333	0	2	134.833	0	2	134.833	0	2	58.6667	0	1	58.6667	0	1	33.2	0	1	33.2	0	1	75.8	1	0	27.1333	1	0	43.8	1	0	43.8	1	0
76.6333	0	76.6333	0	10.3	1	2	9.1	1	2	4.66667	1	2	4.66667	1	2	3.16667	1	1	0.266667	1	1	6.73333	1	1	6.73333	1	1	78.6	1	0	36.6667	1	0	19.6333	1	0	6.3	1	0
28.4333	1	13.7667	1	43.8	1	2	43.8	1	2	18.7333	1	2	11.1667	1	2	33.2	0	1	33.2	0	1	14.6	1	1	9.66667	1	1	24.8	1	0	13.1	1	0	44.4333	1	0	24.8667	1	0
75.7	0	75.7	0	14.9	1	2	14.9	1	2	123.533	0	2	123.533	0	2	6.73333	1	1	6.73333	1	1	83.0333	1	1	83.0333	1	1	71.8333	1	0	71.8333	1	0	46.0667	0	0	46.0667	0	0
81.2667	1	41	1	19.6333	1	2	6.3	1	2	24.8	1	2	13.1	1	2	14.6	1	1	9.66667	1	1	117.567	1	1	5.46667	1	1	19.6333	1	0	6.3	1	0	34.1667	1	0	19.9667	1	0
14.4667	1	9.33333	1	56.4333	0	2	56.4333	0	2	39.4	1	2	27.1	1	2	83.0333	1	1	83.0333	1	1	12.6333	1	1	12.6333	1	1	72.0333	1	0	71.3667	1	0	6.23333	1	0	6.23333	1	0
74.0667	0	74.0667	0	17.2333	1	2	6.83333	1	2	100.833	0	2	100.833	0	2	2.13333	1	1	2.13333	1	1	28.7667	0	1	4.1	1	1	21.6	1	0	19.5667	1	0	29.2333	1	0	29.2333	1	0
27.7	1	26.7667	1	53.1333	0	2	53.1333	0	2	100.6	0	2	100.6	0	2	117.567	1	1	5.46667	1	1	15.7333	1	1	14.6667	1	1	27.1667	1	0	27.1667	1	0	143.7	0	0	143.7	0	0
73.6333	0	73.6333	0	44.4333	1	2	24.8667	1	2	71.8333	1	2	71.8333	1	2	12.6333	1	1	12.6333	1	1	21.6	1	1	19.5667	1	1	39.4	1	0	27.1	1	0	15.2333	0	0	15.2333	0	0
10.3	1	9.1	1	46.8667	0	2	46.8667	0	2	110.733	0	2	110.733	0	2	12.9333	1	1	4.13333	1	1	57.4	1	1	6.6	1	1	16.1	1	0	16.1	1	0	37.1333	1	0	29.4	1	0
38.2333	1	38.2333	1	46.0667	0	2	46.0667	0	2	106.6	0	2	106.6	0	2	28.7667	0	1	4.1	1	1	38.2333	1	1	38.2333	1	1	70.9667	1	0	70.9667	1	0	79.9	0	0	79.9	0	0
12.5333	1	10.3667	1	44.9667	0	2	44.9667	0	2	93.1	0	2	93.1	0	2	15.7333	1	1	14.6667	1	1	2.63333	1	1	2.63333	1	1	30.4667	1	0	25.6	1	0	31.9333	0	0	21.4333	1	0
33.2333	1	26.2667	1	15.9667	1	2	15.4333	1	2	25.3333	1	2	21.2	1	2	21.6	1	1	19.5667	1	1	18.5667	1	1	18.5667	1	1	24.5	1	0	10.9333	1	0	53.1333	0	0	53.1333	0	0
69.2667	0	69.2667	0	34.1667	1	2	19.9667	1	2	100.567	0	2	100.567	0	2	57.4	1	1	6.6	1	1	9.6	1	1	11.5333	1	1	14.4667	1	0	9.33333	1	0	17.1333	0	0	17.1333	0	0
70.3	0	70.3	0	36.5	0	2	36.5	0	2	45.4	1	2	45.4	1	2	38.2333	1	1	38.2333	1	1	13.3667	0	1	3.26667	1	1	34.1667	1	0	19.9667	1	0	12	1	0	9.46667	1	0
43.8	1	43.8	1	20.1333	1	2	16.2667	1	2	66.7667	1	2	58	1	2	2.63333	1	1	2.63333	1	1	136.1	0	1	136.1	0	1	19.1667	1	0	14.7667	1	0	84.7667	0	0	84.7667	0	0
69.2667	0	69.2667	0	6.23333	1	2	6.23333	1	2	84.4333	0	2	84.4333	0	2	18.5667	1	1	18.5667	1	1	69.2667	0	1	69.2667	0	1	25.1	0	0	15.0667	1	0	70.3	0	1	70.3	0	1
14.9	1	14.9	1	193.4	0	2	193.4	0	2	55.1333	1	2	8.83333	1	2	9.6	1	1	11.5333	1	1	51.2	0	1	51.2	0	1	13.3667	0	0	3.26667	1	0	45.4333	0	1	16.6667	1	1
7.86667	1	1.16667	1	19.1667	1	2	14.7667	1	2	55.8667	1	2	55.8667	1	2	13.3667	0	1	3.26667	1	1	37.2667	0	1	37.2667	0	1	23.1333	1	0	8.9	1	0	33.7	0	1	33.7	0	1
23.1333	1	8.9	1	21.5667	1	2	21.5667	1	2	12.8	1	2	12.8	1	2	136.1	0	2	136.1	0	2	22.4	0	1	22.4	0	1	27.7	1	0	26.7667	1	0	45.4	1	1	45.4	1	1
11.5	1	7.53333	1	72.0333	1	2	71.3667	1	2	76.6333	0	2	76.6333	0	2	69.2667	0	2	69.2667	0	2	15.6667	1	1	10.0333	1	1	44.4333	1	0	24.8667	1	0	10.7	1	1	7.76667	1	1
19.6333	1	6.3	1	29.2333	1	2	29.2333	1	2	75.7	0	2	75.7	0	2	51.2	0	2	51.2	0	2	56.4333	0	1	56.4333	0	1	43.8	1	0	43.8	1	0	120.333	0	1	120.333	0	1
30.4333	1	28.4	1	143.7	0	2	143.7	0	2	74.0667	0	2	74.0667	0	2	12	1	2	9.46667	1	2	17.2333	1	1	6.83333	1	1	84.7667	0	0	84.7667	0	0	114.267	0	1	114.267	0	1
21.1667	1	13.4333	1	140.767	0	2	140.767	0	2	73.6333	0	2	73.6333	0	2	37.2667	0	2	37.2667	0	2	44.9667	0	1	44.9667	0	1	84.4333	0	0	84.4333	0	0	16.1	1	1	16.1	1	1
58.6667	0	58.6667	0	141.1	0	2	141.1	0	2	10.3	1	2	9.1	1	2	31.9333	0	2	21.4333	1	2	36.5	0	1	36.5	0	1	100.6	0	0	100.6	0	0	111.5	0	1	111.5	0	1
56.4333	0	56.4333	0	137.833	0	2	137.833	0	2	43.8	1	2	43.8	1	2	22.4	0	2	22.4	0	2	141.1	0	1	141.1	0	1	36.5	0	0	36.5	0	0	14.4667	1	1	9.33333	1	1
8.33333	1	5.8	1	37.1333	1	2	29.4	1	2	14.9	1	2	14.9	1	2	15.6667	1	2	10.0333	1	2	29.3667	0	1	29.3667	0	1	177.067	0	0	177.067	0	0	27.7	1	1	26.7667	1	1
17.2333	1	6.83333	1	22.3	0	2	22.3	0	2	19.6333	1	2	6.3	1	2	56.4333	0	2	56.4333	0	2	25.1	0	1	15.0667	1	1	22.5333	0	0	22.5333	0	0	58.6667	0	1	58.6667	0	1
53.1333	0	53.1333	0	29.3667	0	2	29.3667	0	2	44.4333	1	2	24.8667	1	2	17.2333	1	2	6.83333	1	2	17.2	0	1	17.2	0	1	16.0333	0	0	16.0333	0	0	33.2	0	1	33.2	0	1
51.2	0	51.2	0	25.1	0	2	15.0667	1	2	46.8667	0	2	46.8667	0	2	53.1333	0	2	53.1333	0	2	16.2	0	1	16.2	0	1	69.2667	0	0	69.2667	0	0	6.73333	1	1	6.73333	1	1
50.8333	0	50.8333	0	11.6667	1	2	10.2667	1	2	46.0667	0	2	46.0667	0	2	44.9667	0	2	44.9667	0	2	34.2333	1	1	3.46667	1	1	33.2	0	0	33.2	0	0	14.6	1	1	9.66667	1	1
44.4333	1	24.8667	1	17.4667	0	2	17.4667	0	2	15.9667	1	2	15.4333	1	2	36.5	0	2	36.5	0	2	88.3	0	1	88.3	0	1	50.8333	0	0	50.8333	0	0	83.0333	1	1	83.0333	1	1
46.8667	0	46.8667	0	17.2	0	2	17.2	0	2	34.1667	1	2	19.9667	1	2	141.1	0	2	141.1	0	2	181.967	0	1	181.967	0	1	69.2667	0	0	69.2667	0	0	12.6333	1	1	12.6333	1	1
46.0667	0	46.0667	0	17.1333	0	2	17.1333	0	2	20.1333	1	2	16.2667	1	2	29.3667	0	2	29.3667	0	2	16.0333	0	1	16.0333	0	1	16.9667	1	0	3.3	1	0	21.6	1	1	19.5667	1	1
45.4333	0	16.6667	1	16.6333	0	2	16.6333	0	2	6.23333	1	2	6.23333	1	2	25.1	0	2	15.0667	1	2	11.7667	0	1	8.46667	1	1	19.5	0	0	19.5	0	0	13.3667	0	1	3.26667	1	1
44.9667	0	44.9667	0	16.2	0	2	16.2	0	2	193.4	0	2	193.4	0	2	17.2	0	2	17.2	0	2	30.4333	1	1	28.4	1	1	19.2	0	0	19.2	0	0	34.2333	1	1	3.46667	1	1
45.2333	0	45.2333	0	15.2333	0	2	15.2333	0	2	19.1667	1	2	14.7667	1	2	17.1333	0	2	17.1333	0	2	34.8333	1	1	22.4667	1	1	181.967	0	0	181.967	0	0	16.0333	0	1	16.0333	0	1
27.1667	1	27.1667	1	12.8667	1	3	12.4	1	3	21.5667	1	2	21.5667	1	2	16.2	0	2	16.2	0	2	112.3	0	1	112.3	0	1	137.833	0	0	137.833	0	0	75.8	1	1	27.1333	1	1
15.9667	1	15.4333	1	10.7	1	3	7.76667	1	3	72.0333	1	2	71.3667	1	2	34.2333	1	2	3.46667	1	2	73.2333	1	1	73.2333	1	1	102.7	0	0	102.7	0	0	78.6	1	1	36.6667	1	1
40.8	0	40.8	0	75.8	1	3	27.1333	1	3	29.2333	1	2	29.2333	1	2	88.3	0	2	88.3	0	2	40.6667	1	1	14.5667	1	1	193.4	0	0	193.4	0	0	24.5	1	1	10.9333	1	1
34.1667	1	19.9667	1	128.267	0	3	16.5	1	3	143.7	0	2	143.7	0	2	181.967	0	2	181.967	0	2	4.66667	1	1	4.66667	1	1	143.7	0	0	143.7	0	0	11.5	1	1	7.53333	1	1
16.9667	1	3.3	1	40.3	1	3	25.8	1	3	140.767	0	2	140.767	0	2	16.0333	0	2	16.0333	0	2	18.7333	1	1	11.1667	1	1	141.1	0	0	141.1	0	0	16.9667	1	1	3.3	1	1
12	1	9.46667	1	120.333	0	3	120.333	0	3	137.833	0	2	137.833	0	2	11.7667	0	2	8.46667	1	2	24.8	1	1	13.1	1	1	70.3	0	0	70.3	0	0	24	1	1	6.9	1	1
3.16667	1	0.266667	1	78.6	1	3	36.6667	1	3	11.6667	1	2	10.2667	1	2	30.4333	1	2	28.4	1	2	39.4	1	1	27.1	1	1	40.8	0	0	40.8	0	0	19.2	0	1	19.2	0	1
2.63333	1	2.63333	1	114.267	0	3	114.267	0	3	17.4667	0	2	17.4667	0	2	34.8333	1	2	22.4667	1	2	25.3333	1	1	21.2	1	1	103.3	0	0	103.3	0	0	12.9333	1	1	4.13333	1	1
33.7	0	33.7	0	16.1	1	3	16.1	1	3	16.6333	0	2	16.6333	0	2	112.3	0	2	112.3	0	2	100.567	0	1	100.567	0	1	46.8667	0	0	46.8667	0	0	30.4667	1	1	25.6	1	1
36.5	0	36.5	0	111.5	0	3	111.5	0	3	15.2333	0	2	15.2333	0	2	73.2333	1	2	73.2333	1	2	55.1333	1	1	8.83333	1	1	141.333	0	0	141.333	0	0	23.2667	0	1	23.2667	0	1
33.2	0	33.2	0	42	1	3	35.8667	1	3	12.8667	1	2	12.4	1	2	40.6667	1	2	14.5667	1	2	55.8667	1	1	55.8667	1	1	134.367	0	0	134.367	0	0
18.5667	1	18.5667	1	103.3	0	3	103.3	0	3	10.7	1	2	7.76667	1	2	84.7667	0	2	84.7667	0	2	73.6333	0	1	73.6333	0	1	136.1	0	0	136.1	0	0
20.1333	1	16.2667	1	30.4667	1	3	25.6	1	3	75.8	1	2	27.1333	1	2	4.66667	1	2	4.66667	1	2	10.3	1	1	9.1	1	1	112.3	0	0	112.3	0	0
6.73333	1	6.73333	1	34.2333	1	3	3.46667	1	3	128.267	0	2	16.5	1	2	18.7333	1	2	11.1667	1	2	43.8	1	1	43.8	1	1	23.2667	0	0	23.2667	0	0
6.23333	1	6.23333	1	26.5333	1	3	12.9333	1	3	40.3	1	2	25.8	1	2	24.8	1	2	13.1	1	2	19.6333	1	1	6.3	1	1	22.8333	0	0	22.8333	0	0
14.6	1	9.66667	1	88.3	0	3	88.3	0	3	120.333	0	2	120.333	0	2	39.4	1	2	27.1	1	2	44.4333	1	1	24.8667	1	1	134.833	0	0	134.833	0	0
193.4	0	193.4	0	24.5	1	3	10.9333	1	3	78.6	1	2	36.6667	1	2	25.3333	1	2	21.2	1	2	46.0667	0	1	46.0667	0	1	156.467	0	0	156.467	0	0
187.333	0	187.333	0	46.8	1	3	8.23333	1	3	114.267	0	2	114.267	0	2	100.567	0	2	100.567	0	2	15.9667	1	1	15.4333	1	1	16.6333	0	0	16.6333	0	0
14.9	1	14.9	1	28.4333	1	3	13.7667	1	3	16.1	1	2	16.1	1	2	84.4333	0	2	84.4333	0	2	34.1667	1	1	19.9667	1	1	120.333	0	0	120.333	0	0
19.1667	1	14.7667	1	14.4667	1	3	9.33333	1	3	111.5	0	2	111.5	0	2	55.1333	1	2	8.83333	1	2	20.1333	1	1	16.2667	1	1	79.9	0	0	79.9	0	0
83.0333	1	83.0333	1	27.7	1	3	26.7667	1	3	42	1	2	35.8667	1	2	55.8667	1	2	55.8667	1	2	6.23333	1	1	6.23333	1	1	187.333	0	0	187.333	0	0
181.967	0	181.967	0	12.5333	1	3	10.3667	1	3	103.3	0	2	103.3	0	2	12.8	1	2	12.8	1	2	21.5667	1	1	21.5667	1	1	22.3	0	0	22.3	0	0
2.13333	1	2.13333	1	33.2333	1	3	26.2667	1	3	30.4667	1	2	25.6	1	2	73.6333	0	2	73.6333	0	2	29.2333	1	1	29.2333	1	1	24.1333	0	0	24.1333	0	0
21.5667	1	21.5667	1	70.3	0	3	70.3	0	3	26.5333	1	2	12.9333	1	2	10.3	1	2	9.1	1	2	143.7	0	1	143.7	0	1	17.4667	0	0	17.4667	0	0
177.067	0	177.067	0	11.5	1	3	7.53333	1	3	24.5	1	2	10.9333	1	2	43.8	1	2	43.8	1	2	137.833	0	1	137.833	0	1	100.833	0	0	100.833	0	0
24	1	6.9	1	21.1667	1	3	13.4333	1	3	46.8	1	2	8.23333	1	2	19.6333	1	2	6.3	1	2	11.6667	1	1	10.2667	1	1	100.567	0	0	100.567	0	0
72.0333	1	71.3667	1	58.6667	0	3	58.6667	0	3	28.4333	1	2	13.7667	1	2	44.4333	1	2	24.8667	1	2	17.4667	0	1	17.4667	0	1	73.6333	0	0	73.6333	0	0
82.9	1	82.9	1	8.33333	1	3	5.8	1	3	14.4667	1	2	9.33333	1	2	46.0667	0	2	46.0667	0	2	16.6333	0	1	16.6333	0	1	33.7	0	0	33.7	0	0
29.2333	1	29.2333	1	50.8333	0	3	50.8333	0	3	27.7	1	2	26.7667	1	2	15.9667	1	2	15.4333	1	2	15.2333	0	1	15.2333	0	1	29.3667	0	0	29.3667	0	0
156.467	0	156.467	0	45.4333	0	3	16.6667	1	3	12.5333	1	2	10.3667	1	2	34.1667	1	2	19.9667	1	2	75.8	1	1	27.1333	1	1	117.1	0	0	117.1	0	0
117.567	1	5.46667	1	16.9667	1	3	3.3	1	3	33.2333	1	2	26.2667	1	2	20.1333	1	2	16.2667	1	2	40.3	1	1	25.8	1	1	40.6667	1	0	14.5667	1	0
10.3667	1	9.96667	1	3.16667	1	3	0.266667	1	3	11.5	1	2	7.53333	1	2	6.23333	1	2	6.23333	1	2	78.6	1	1	36.6667	1	1	51.2	0	0	51.2	0	0
68	1	2	1	33.7	0	3	33.7	0	3	21.1667	1	2	13.4333	1	2	21.5667	1	2	21.5667	1	2	42	1	1	35.8667	1	1	45.2333	0	0	45.2333	0	0
12.6333	1	12.6333	1	33.2	0	3	33.2	0	3	58.6667	0	2	58.6667	0	2	29.2333	1	2	29.2333	1	2	26.5333	1	1	12.9333	1	1	37.2667	0	0	37.2667	0	0
143.7	0	143.7	0	6.73333	1	3	6.73333	1	3	8.33333	1	2	5.8	1	2	143.7	0	2	143.7	0	2	24.5	1	1	10.9333	1	1	24.6333	0	0	24.6333	0	0
141.333	0	141.333	0	14.6	1	3	9.66667	1	3	50.8333	0	2	50.8333	0	2	137.833	0	2	137.833	0	2	12.5333	1	1	10.3667	1	1	22.4	0	0	22.4	0	0
140.767	0	140.767	0	83.0333	1	3	83.0333	1	3	16.9667	1	2	3.3	1	2	11.6667	1	2	10.2667	1	2	33.2333	1	1	26.2667	1	1	123.533	0	0	123.533	0	0
141.1	0	141.1	0	181.967	0	3	181.967	0	3	3.16667	1	2	0.266667	1	2	17.4667	0	2	17.4667	0	2	11.5	1	1	7.53333	1	1	88.3	0	0	88.3	0	0
137.833	0	137.833	0	2.13333	1	3	2.13333	1	3	33.2	0	2	33.2	0	2	16.6333	0	2	16.6333	0	2	8.33333	1	1	5.8	1	1	114.267	0	0	114.267	0	0
37.1333	1	29.4	1	24	1	3	6.9	1	3	6.73333	1	2	6.73333	1	2	15.2333	0	2	15.2333	0	2	50.8333	0	1	50.8333	0	1	110.733	0	0	110.733	0	0
37.2667	0	37.2667	0	82.9	1	3	82.9	1	3	14.6	1	2	9.66667	1	2	12.8667	1	2	12.4	1	2	16.9667	1	1	3.3	1	1	106.6	0	0	106.6	0	0
22.3	0	22.3	0	156.467	0	3	156.467	0	3	83.0333	1	2	83.0333	1	2	75.8	1	2	27.1333	1	2	24	1	1	6.9	1	1	88.2	0	0	88.2	0	0
15.4	1	1	1	117.567	1	3	5.46667	1	3	2.13333	1	2	2.13333	1	2	40.3	1	2	25.8	1	2	82.9	1	1	82.9	1	1	74.0667	0	0	74.0667	0	0
19.5	0	19.5	0	12.6333	1	3	12.6333	1	3	24	1	2	6.9	1	2	78.6	1	2	36.6667	1	2	156.467	0	1	156.467	0	1	46.0667	0	0	46.0667	0	0
29.5667	0	13.6	1	141.333	0	3	141.333	0	3	82.9	1	2	82.9	1	2	42	1	2	35.8667	1	2	141.333	0	1	141.333	0	1	15.2333	0	0	15.2333	0	0
31.9333	0	21.4333	1	12.9333	1	3	4.13333	1	3	156.467	0	2	156.467	0	2	30.4667	1	2	25.6	1	2	11.7667	1	1	8.76667	1	1	83.1667	0	0	83.1667	0	0
12.9333	1	4.13333	1	28.7667	0	3	4.1	1	3	117.567	1	2	5.46667	1	2	26.5333	1	2	12.9333	1	2	24.1333	0	1	24.1333	0	1	111.5	0	0	111.5	0	0
28.7667	0	4.1	1	11.7667	1	3	8.76667	1	3	12.6333	1	2	12.6333	1	2	24.5	1	2	10.9333	1	2	19.2	0	1	19.2	0	1	90.5667	0	0	90.5667	0	0
29.3667	0	29.3667	0	24.1333	0	3	24.1333	0	3	141.333	0	2	141.333	0	2	46.8	1	2	8.23333	1	2	24.8333	1	1	3.26667	1	1	76.6333	0	0	76.6333	0	0
11.7667	1	8.76667	1	23.2667	0	3	23.2667	0	3	12.9333	1	2	4.13333	1	2	12.5333	1	2	10.3667	1	2	5.03333	1	1	5.03333	1	1	56.4333	0	0	56.4333	0	0
8.86667	1	1.6	1	15.7333	1	3	14.6667	1	3	28.7667	0	2	4.1	1	2	33.2333	1	2	26.2667	1	2	27.3333	1	1	27.3333	1	1	53.1333	0	0	53.1333	0	0
25.1	0	15.0667	1	21.6	1	3	19.5667	1	3	11.7667	1	2	8.76667	1	2	11.5	1	2	7.53333	1	2	7.86667	1	1	1.16667	1	1	44.9667	0	0	44.9667	0	0
24.1333	0	24.1333	0	20.6	1	3	20.6	1	3	24.1333	0	2	24.1333	0	2	8.33333	1	2	5.8	1	2	23.1333	1	1	8.9	1	1	140.767	0	0	140.767	0	0
24.6333	0	24.6333	0	19.2	0	3	19.2	0	3	23.2667	0	2	23.2667	0	2	50.8333	0	2	50.8333	0	2	14.9	1	1	14.9	1	1	93.1	0	0	93.1	0	0
7.83333	1	5.7	1	16.0333	0	3	16.0333	0	3	15.7333	1	2	14.6667	1	2	16.9667	1	2	3.3	1	2	15.4	1	1	1	1	1	75.7	0	0	75.7	0	0
23.2667	0	23.2667	0	11.7667	0	3	8.46667	1	3	21.6	1	2	19.5667	1	2	24	1	2	6.9	1	2	8.86667	1	1	1.6	1	1	58.6667	0	0	58.6667	0	0
15.7333	1	14.6667	1	24.8333	1	4	3.26667	1	4	20.6	1	2	20.6	1	2	82.9	1	2	82.9	1	2	7.83333	1	1	5.7	1	1	17.2	0	0	17.2	0	0
21.6	1	19.5667	1	5.03333	1	4	5.03333	1	4	19.2	0	2	19.2	0	2	156.467	0	2	156.467	0	2	37.1333	1	2	29.4	1	2	17.1333	0	0	17.1333	0	0
11.6667	1	10.2667	1	57.4	1	4	6.6	1	4	24.8333	1	2	3.26667	1	2	141.333	0	2	141.333	0	2	79.9	0	2	79.9	0	2	16.2	0	0	16.2	0	0
20.6	1	20.6	1	27.3333	1	4	27.3333	1	4	5.03333	1	2	5.03333	1	2	11.7667	1	2	8.76667	1	2	2.13333	1	2	2.13333	1	2	8.86667	1	1	1.6	1	1
22.5333	0	22.5333	0	8.23333	1	4	5.86667	1	4	57.4	1	2	6.6	1	2	24.1333	0	2	24.1333	0	2	12.9333	1	2	4.13333	1	2	24.8333	1	1	3.26667	1	1
22.4	0	22.4	0	38.2333	1	4	38.2333	1	4	27.3333	1	2	27.3333	1	2	23.2667	0	2	23.2667	0	2	31.9333	0	2	21.4333	1	2	34.2333	1	1	3.46667	1	1
22.8333	0	22.8333	0	7.86667	1	4	1.16667	1	4	8.23333	1	2	5.86667	1	2	20.6	1	2	20.6	1	2	53.1333	0	2	53.1333	0	2	15.7333	1	1	14.6667	1	1
9.6	1	11.5333	1	23.1333	1	4	8.9	1	4	38.2333	1	2	38.2333	1	2	19.2	0	2	19.2	0	2	17.1333	0	2	17.1333	0	2	82.9	1	1	82.9	1	1
17.4667	0	17.4667	0	30.4333	1	4	28.4	1	4	7.86667	1	2	1.16667	1	2	24.8333	1	2	3.26667	1	2	12.8667	1	2	12.4	1	2	5.03333	1	1	5.03333	1	1
17.2	0	17.2	0	27.1667	1	4	27.1667	1	4	23.1333	1	2	8.9	1	2	5.03333	1	2	5.03333	1	2	30.4667	1	2	25.6	1	2	11.7667	1	1	8.76667	1	1
17.1333	0	17.1333	0	2.63333	1	4	2.63333	1	4	2.63333	1	2	2.63333	1	2	27.3333	1	2	27.3333	1	2	23.2667	0	2	23.2667	0	2	3.16667	1	1	0.266667	1	1
16.6333	0	16.6333	0	18.5667	1	4	18.5667	1	4	18.5667	1	2	18.5667	1	2	8.23333	1	2	5.86667	1	2	20.6	1	2	20.6	1	2	15.4	1	1	1	1	1
19.2	0	19.2	0	14.9	1	4	14.9	1	4	14.9	1	2	14.9	1	2	7.86667	1	2	1.16667	1	2	8.23333	1	2	5.86667	1	2	27.3333	1	1	27.3333	1	1
16.2	0	16.2	0	15.4	1	4	1	1	4	15.4	1	2	1	1	2	23.1333	1	2	8.9	1	2							128.267	0	1	16.5	1	1
16.0333	0	16.0333	0	8.86667	1	4	1.6	1	4	8.86667	1	2	1.6	1	2	14.9	1	2	14.9	1	2							57.4	1	1	6.6	1	1
15.2333	0	15.2333	0	7.83333	1	4	5.7	1	4	7.83333	1	2	5.7	1	2	15.4	1	2	1	1	2							12.5333	1	1	10.3667	1	1
13.3667	0	3.26667	1	9.6	1	4	11.5333	1	4	9.6	1	2	11.5333	1	2	8.86667	1	2	1.6	1	2							30.4333	1	1	28.4	1	1
11.7667	0	8.46667	1	13.3667	0	4	3.26667	1	4	13.3667	0	2	3.26667	1	2	7.83333	1	2	5.7	1	2							28.7667	0	1	4.1	1	1
