# Supplementary material for: Prognostic factors and treatment of neuroendocrine tumors of the uterine cervix based on the FIGO 2018 staging system: a single-institution study of 172 patients
Source: PeerJ. 2021 Jul 6;9:e11563. doi: 10.7717/peerj.11563 (PMC8269661; doi:10.7717/peerj.11563)
Supplement: Supplemental Information 2 [file peerj-09-11563-s002.xlsx]

## Sheet: Sheet1
figo stage	age	Maximum diameter of tumor（cm）	tumorsize	tumor progression=1	time of tumor progression	（PFS，months）	metastasis site	staus：alive=0；dead=1；	time of death	end time	OS,months	time of diagnose	Histological type;1=small cell carcinoma；2=large cell carcinoma；3=typical carcinoid tumor	Histological homology（1=mixed，0=pure）	LN staus:1=positive;0=negative	pelvic LN staus:1=positive;0=negative	Para-aortic LN staus:1=positive;0=negative	myelosuppression	gastrointestinal reaction	hepatic dysfunction	Toxicity：grade 3-4=1；grade1-2 =2；	Chemotherapy regimen（TP=1，Ep=2，other=3）	Cycles of chemotherapy	Cycles of chemotherapy：1≥6；0＜6
IVB	78	4.5	4×4×3	1	2010-09-07	3.26667	liver,lung,bone	1	2012-06-15	2012-06-15	24.8333	2010-06-01	1	0	1	1	1	1	1	0	2	1	2	0
IVB	56	6	6×6×5cm	1	2012-01-30	5.03333	Supraclavicular lymph node，bone	1	2012-01-30	2012-01-30	5.03333	2011-09-01	1	0	1	1	1	1	0	0	1	1	4	0
IVb	45	4.5	4cm	1	2013-02-20	6.6	liver，bone	1	2017-04-24	2017-04-24	57.4	2012-08-06	1	0	1	1	1	1	0	0	1	1	6	1
IVB	63	4.5	4×3×3cm	1	2016-03-02	27.3333	lung	1	2016-03-02	2016-03-02	27.3333	2013-12-03	1	1	1	1	1	1	0	0	2	1	6	1
IVB	47	5	5×4×3cm	1	2014-07-31	5.86667	Ileocecum, rectum, liver, adrenal gland	1	2014-10-10	2014-10-10	8.23333	2014-02-05	3	0	1	1	0	0	0	0	2	3	5	0
IVB	45	5	5×5×3	1	2017-08-25	38.2333	liver	1	2017-08-25	2017-08-25	38.2333	2014-07-05	1	0	1	1	0	1	0	1	1	2	6	1
IVB	47	8	8.3*8.7*6.1	1	2015-03-03	1.16667	lung	1	2015-09-20	2015-09-20	7.86667	2015-01-27	1	0	1	1	0	1	1	0	1	2	3	0
IVB	52	5	3.2*3.4*4.1	1	2016-01-13	8.9	liver	1	2017-03-15	2017-03-15	23.1333	2015-04-21	1	0	0	0	0	1	0	1	1	2	8	1
IVB	47	3.8	3.8*2.6	1	2017-08-13	28.4	bone	1	2017-10-13	2017-10-13	30.4333	2015-04-14	1	0	1	1	1	0	0	0	2	2	6	1
IVB	33	3.4	3.4*2.8*2.5	1	2019-04-01	27.1667	liver	1	2019-04-01	2019-04-01	27.1667	2017-01-06	1	0	1	1	0	1	0	1	1	2	7	1
IVB	44	6.5	6.5*6*5.5	1	2017-11-15	2.63333	Supraclavicular lymph node	1	2017-11-15	2017-11-15	2.63333	2017-08-28	1	0	0	0	0	0	0	0	2	1	2	0
IVB	45	5	5*4*2	1	2019-04-23	18.5667	Supraclavicular lymph node	1	2019-04-23	2019-04-23	18.5667	2017-10-13	1	0	1	1	0	1	0	0	2	2	5	0
IVB	53	4.5	4	1	2005-05-01	14.9	lung	1	2005-05-01	2005-05-01	14.9	2004-02-09	1	0	0	0	0	0	0	0	2	1	2	0
IVB	55	12	12.1*7.5*4.9	1	2018-09-30	1	Inguinal lymph nodes	1	2019-12-06	2019-12-06	15.4	2018-08-31	1	1	1	1	1	1	0	0	1	2	5	0
IVB	68	6	6	1	2018-06-02	1.6	bone	1	2019-01-06	2019-01-06	8.86667	2018-04-15	1	0	1	1	1	1	0	0	2	1	1	0
IVB	52	5	5×4×3cm3	1	2018-11-29	5.7	liver	1	2019-02-01	2019-02-01	7.83333	2018-06-11	1	0	0	0	0	1	0	0	1	2	4	0
IVB	32	4.5	4	1	2019-08-22	11.5333	pancreatic	1	2019-06-25	2019-06-25	9.6	2018-09-10	1	1	0	0	0	1	0	1	1	2	1	0
IVB	44	4.5	4.5	1	2019-08-16	3.26667	cardiac	0		2020-06-14	13.3667	2019-05-10	1	1	1	1	0	1	0	1	1	1	7	1
